# Supplementary material
Source: publisher figshare collection journal article supplement (https://tandf.figshare.com/ndownloader/files/13564394)
Supplement: Supplementary file 1 [file 13564394]

ANNEX I Coordinates of validation points (WGS84 UTM34)

| No | X | Y |
| --- | --- | --- |
| 1 | 413047 | 5012256 |
| 2 | 419621 | 5003332 |
| 3 | 437221 | 5003459 |
| 4 | 438110 | 5002888 |
| 5 | 438849 | 5002555 |
| 6 | 439840 | 5002161 |
| 7 | 441189 | 5000999 |
| 8 | 442980 | 4998837 |
| 9 | 442909 | 4999066 |
| 10 | 441679 | 4999167 |
| 11 | 442135 | 4998391 |
| 12 | 442241 | 4999131 |
| 13 | 442419 | 4997954 |
| 14 | 442207 | 4998153 |
| 15 | 443207 | 4997111 |
| 16 | 442934 | 4997263 |
| 17 | 444101 | 4996838 |
| 18 | 443717 | 4996217 |
| 19 | 443483 | 4996788 |
| 20 | 443362 | 4998023 |
| 21 | 436690 | 5003108 |
| 22 | 436870 | 5002680 |
| 23 | 437142 | 5002853 |
| 24 | 435278 | 5004090 |
| 25 | 436518 | 5003678 |
| 26 | 434171 | 5003704 |
| 27 | 434621 | 5003235 |
| 28 | 433573 | 5002970 |
| 29 | 432919 | 5002702 |
| 30 | 431898 | 5002006 |
| 31 | 430296 | 5001650 |
| 32 | 431077 | 5001716 |
| 33 | 431559 | 5001811 |
| 34 | 431238 | 5001917 |
| 35 | 430489 | 5001762 |
| 36 | 428794 | 5001881 |
| 37 | 427889 | 5001990 |
| 38 | 426195 | 5001840 |
| 39 | 425446 | 5001887 |
| 40 | 424168 | 5001999 |
| 41 | 423767 | 5002245 |
| 42 | 423589 | 5002073 |
| 43 | 422821 | 5002300 |
| 44 | 421942 | 5002668 |
| 45 | 421499 | 5002871 |
| 46 | 420788 | 5003107 |
| 47 | 419279 | 5003565 |
| 48 | 418485 | 5004094 |
| 49 | 418099 | 5004391 |
| 50 | 418158 | 5004480 |
| 51 | 417530 | 5005293 |
| 52 | 416891 | 5006313 |
| 53 | 416214 | 5007396 |
| 54 | 415342 | 5008798 |
| 55 | 414739 | 5010229 |
| 56 | 414980 | 5009459 |
| 57 | 414198 | 5011154 |
| 58 | 413290 | 5011869 |
| 59 | 413087 | 5012406 |
| 60 | 414491 | 5011697 |
| 61 | 415306 | 5010921 |
| 62 | 415393 | 5010114 |
| 63 | 415120 | 5010480 |
| 64 | 415505 | 5009366 |
| 65 | 415751 | 5009170 |
| 66 | 415911 | 5009166 |
| 67 | 416404 | 5008329 |
| 68 | 416642 | 5007964 |
| 69 | 416767 | 5007532 |
| 70 | 417758 | 5006134 |
| 71 | 417548 | 5006256 |
| 72 | 418151 | 5005338 |
| 73 | 419087 | 5004300 |
| 74 | 420692 | 5003459 |
| 75 | 422441 | 5003991 |
| 76 | 422439 | 5003890 |
| 77 | 426257 | 5002364 |
| 78 | 423239 | 5002963 |
| 79 | 423903 | 5002692 |
| 80 | 423056 | 5003056 |
| 81 | 429291 | 5002578 |
| 82 | 428398 | 5002407 |
| 83 | 432501 | 5002858 |
| 84 | 432951 | 5003553 |
| 85 | 432058 | 5003792 |
| 86 | 424106 | 5006784 |
| 87 | 424600 | 5006597 |
| 88 | 423611 | 5006722 |
| 89 | 423188 | 5007111 |
| 90 | 422781 | 5006709 |
| 91 | 422977 | 5006433 |
| 92 | 422812 | 5006418 |
| 93 | 423757 | 5006515 |
| 94 | 444002 | 4995748 |
| 95 | 444418 | 4996274 |
| 96 | 444690 | 4995767 |
| 97 | 445297 | 4993073 |
| 98 | 444679 | 4993978 |
| 99 | 445886 | 4992658 |
| 100 | 446196 | 4992265 |
| 101 | 446695 | 4992601 |
| 102 | 447260 | 4992450 |
| 103 | 446492 | 4993072 |
| 104 | 444930 | 4995236 |
| 105 | 445402 | 4994453 |
| 106 | 443151 | 4998591 |
| 107 | 443402 | 4998876 |
| 108 | 443308 | 4999393 |
| 109 | 443663 | 4999826 |
| 110 | 443392 | 5000009 |
| 111 | 443237 | 5000832 |
| 112 | 443593 | 5000385 |
| 113 | 443011 | 5001642 |
| 114 | 443228 | 5001306 |
| 115 | 443097 | 5002076 |
| 116 | 443271 | 5002154 |
| 117 | 443370 | 5002672 |
| 118 | 443633 | 5002547 |
| 119 | 446748 | 4991798 |
| 120 | 447361 | 4991143 |
| 121 | 448304 | 4990028 |
| 122 | 447875 | 4990547 |
| 123 | 448897 | 4988916 |
| 124 | 449154 | 4988046 |
| 125 | 450195 | 4987902 |
| 126 | 449775 | 4988798 |
| 127 | 449359 | 4989528 |
| 128 | 449162 | 4989985 |
| 129 | 448971 | 4990158 |
| 130 | 448749 | 4990658 |
| 131 | 449532 | 4990496 |
| 132 | 450201 | 4990715 |
| 133 | 451128 | 4990032 |
| 134 | 451765 | 4989451 |
| 135 | 452635 | 4988811 |
| 136 | 453448 | 4988454 |
| 137 | 454259 | 4988198 |
| 138 | 454454 | 4988199 |
| 139 | 453904 | 4989301 |
| 140 | 454042 | 4989324 |
| 141 | 454078 | 4989706 |
| 142 | 454184 | 4990601 |
| 143 | 454670 | 4990829 |
| 144 | 454183 | 4991063 |
| 145 | 454280 | 4991289 |
| 146 | 454411 | 4991744 |
| 147 | 454362 | 4992060 |
| 148 | 454297 | 4992228 |
| 149 | 453906 | 4992470 |
| 150 | 452909 | 4993078 |
| 151 | 451332 | 4993733 |
| 152 | 450023 | 4993227 |
| 153 | 449154 | 4992468 |
| 154 | 448746 | 4992159 |
| 155 | 448261 | 4991902 |
| 156 | 447779 | 4992489 |
| 157 | 446994 | 4993599 |
| 158 | 446165 | 4994242 |
| 159 | 446082 | 4994020 |
| 160 | 446170 | 4993746 |
| 161 | 445615 | 4994827 |
| 162 | 454163 | 4993013 |
| 163 | 454386 | 4993376 |
| 164 | 454225 | 4993677 |
| 165 | 454835 | 4993663 |
| 166 | 454614 | 4993813 |
| 167 | 454312 | 4994257 |
| 168 | 454397 | 4994665 |
| 169 | 454672 | 4994772 |
| 170 | 455192 | 4995041 |
| 171 | 452774 | 4997564 |
| 172 | 452149 | 4996854 |
| 173 | 443991 | 5002924 |
| 174 | 444750 | 5002940 |
| 175 | 445131 | 5003167 |
| 176 | 445690 | 5003942 |
| 177 | 445331 | 5003084 |
| 178 | 446036 | 5004466 |
| 179 | 446045 | 5005875 |
| 180 | 446220 | 5006115 |
| 181 | 445970 | 5007838 |
| 182 | 445633 | 5007966 |
| 183 | 445743 | 5007471 |
| 184 | 445898 | 5008697 |
| 185 | 445175 | 5009551 |
| 186 | 444396 | 5010997 |
| 187 | 444941 | 5010425 |
| 188 | 443553 | 5012305 |
| 189 | 443788 | 5012517 |
| 190 | 444261 | 5011783 |
| 191 | 444862 | 5012645 |
| 192 | 446783 | 5011499 |
| 193 | 442774 | 5013477 |
| 194 | 441420 | 5014300 |
| 195 | 440258 | 5016480 |
| 196 | 440120 | 5016685 |
| 197 | 446999 | 5006505 |
| 198 | 448111 | 5006686 |
| 199 | 449257 | 5006751 |
| 200 | 449934 | 5007015 |
| 201 | 451791 | 5007386 |
| 202 | 452552 | 5008152 |
| 203 | 452417 | 5007838 |
| 204 | 452888 | 5009440 |
| 205 | 453637 | 5011751 |
| 206 | 452133 | 5010639 |
| 207 | 453333 | 5012039 |
| 208 | 451800 | 5010291 |
| 209 | 450721 | 5008768 |
| 210 | 450560 | 5007532 |
| 211 | 449821 | 5007721 |
| 212 | 449022 | 5009179 |
| 213 | 449635 | 5011097 |
| 214 | 450357 | 5007390 |
| 215 | 450291 | 5007738 |
| 216 | 450144 | 5007593 |
| 217 | 450062 | 5007655 |
| 218 | 450234 | 5007568 |
| 219 | 450050 | 5007477 |
| 220 | 449071 | 5007965 |
| 221 | 450080 | 5007427 |
| 222 | 450864 | 5009069 |
| 223 | 455045 | 5014903 |
| 224 | 454833 | 5014778 |
| 225 | 454495 | 5014871 |
| 226 | 454532 | 5014798 |
| 227 | 447480 | 5011111 |
| 228 | 448029 | 5011493 |
| 229 | 447586 | 5011291 |
| 230 | 449394 | 5012901 |
| 231 | 451421 | 5015322 |
| 232 | 453674 | 5014743 |
| 233 | 453967 | 5016875 |
| 234 | 453593 | 5016827 |
| 235 | 414359 | 4992983 |
| 236 | 414763 | 4992004 |
| 237 | 417711 | 4990081 |
| 238 | 416934 | 4989998 |
| 239 | 417716 | 4990155 |
| 240 | 416711 | 4988432 |
| 241 | 420421 | 4992938 |
| 242 | 420850 | 4991440 |
| 243 | 423263 | 4990239 |
| 244 | 422920 | 4990174 |
| 245 | 423113 | 4988682 |
| 246 | 423518 | 4988300 |
| 247 | 415123 | 4990466 |
| 248 | 426784 | 4989534 |
| 249 | 427260 | 4989330 |
| 250 | 428081 | 4989372 |
| 251 | 427750 | 4988916 |
| 252 | 428786 | 4989707 |
| 253 | 435451 | 4991664 |
| 254 | 426293 | 4997787 |
| 255 | 426295 | 4997788 |
| 256 | 425423 | 4998164 |
| 257 | 431863 | 4998876 |
| 258 | 431086 | 4998514 |
| 259 | 440140 | 4998083 |
| 260 | 451759 | 4995188 |
| 261 | 417861 | 5016244 |
| 262 | 421038 | 5014516 |
| 263 | 420580 | 5015070 |
| 264 | 421621 | 5014106 |
| 265 | 419947 | 5015500 |
| 266 | 416294 | 5006045 |
| 267 | 416619 | 5006054 |
| 268 | 416460 | 5005945 |
| 269 | 416256 | 5006158 |
| 270 | 416680 | 5005968 |
| 271 | 413003 | 5005380 |
| 272 | 413046 | 5005371 |
| 273 | 415959 | 5004931 |
| 274 | 416121 | 5004902 |
| 275 | 416035 | 5005044 |
| 276 | 415980 | 5004842 |
| 277 | 416516 | 5004489 |
| 278 | 416514 | 5003818 |
| 279 | 416143 | 5006350 |
| 280 | 416052 | 5006352 |
| 281 | 416733 | 5006488 |
| 282 | 416191 | 5006460 |
| 283 | 416240 | 5006536 |
| 284 | 412985 | 5009315 |
| 285 | 413152 | 5009202 |
| 286 | 412925 | 5009047 |
| 287 | 413044 | 5008878 |
| 288 | 412962 | 5008921 |
| 289 | 413183 | 5008735 |
| 290 | 413014 | 5008723 |
| 291 | 413153 | 5008872 |
| 292 | 413353 | 5008906 |
| 293 | 413179 | 5008512 |
| 294 | 413381 | 5008879 |
| 295 | 412921 | 5010006 |
| 296 | 413061 | 5009729 |
| 297 | 412886 | 5009765 |
| 298 | 412888 | 5010172 |
| 299 | 413009 | 5010828 |
| 300 | 412959 | 5010604 |
| 301 | 412867 | 5010695 |
| 302 | 413281 | 5010671 |
| 303 | 412921 | 5010484 |
| 304 | 413190 | 5010446 |
| 305 | 413204 | 5010395 |
| 306 | 412886 | 5010566 |
| 307 | 412912 | 5010366 |
| 308 | 413052 | 5010717 |
| 309 | 413125 | 5010634 |
| 310 | 428588 | 5013570 |
| 311 | 428650 | 5013569 |
| 312 | 435583 | 5016589 |
| 313 | 431858 | 4998989 |
| 314 | 426723 | 4997788 |
| 315 | 429007 | 4988323 |
| 316 | 423262 | 4989414 |
| 317 | 413988 | 5001994 |
| 318 | 421885 | 5002175 |
| 319 | 419449 | 4999921 |
| 320 | 419083 | 4998910 |
| 321 | 414184 | 4998022 |
| 322 | 416227 | 4997432 |
| 323 | 416302 | 4997448 |
| 324 | 421159 | 4997387 |
| 325 | 413882 | 4999535 |
| 326 | 414759 | 5009157 |
| 327 | 415311 | 5008076 |
| 328 | 425909 | 5001532 |
| 329 | 419457 | 5001971 |
| 330 | 419230 | 5003265 |
| 331 | 421356 | 5000125 |
| 332 | 424079 | 5001404 |
| 333 | 434087 | 5004082 |
| 334 | 436841 | 5004026 |
| 335 | 440154 | 5002009 |
| 336 | 440998 | 5001346 |
| 337 | 441394 | 5000617 |
| 338 | 442226 | 4999785 |
| 339 | 442726 | 5000299 |
| 340 | 442756 | 5001525 |
| 341 | 446309 | 5007469 |
| 342 | 447913 | 5006470 |
| 343 | 445829 | 5003255 |
| 344 | 444702 | 5003312 |
| 345 | 443385 | 5002835 |
| 346 | 443907 | 5002601 |
| 347 | 442633 | 5002461 |
| 348 | 442406 | 5001538 |
| 349 | 443435 | 5001493 |
| 350 | 444085 | 5000524 |
| 351 | 443594 | 4998928 |
| 352 | 443087 | 4997438 |
| 353 | 442088 | 4998573 |
| 354 | 450016 | 4989166 |
| 355 | 449282 | 4990543 |
| 356 | 449869 | 4990956 |
| 357 | 454143 | 4988695 |
| 358 | 454585 | 4989877 |
| 359 | 453494 | 4993253 |
| 360 | 450610 | 4993883 |
| 361 | 452032 | 4993278 |
| 362 | 448733 | 4992504 |
| 363 | 450035 | 4992892 |
| 364 | 451575 | 4993923 |
| 365 | 447455 | 4993149 |
| 366 | 454203 | 4995880 |
| 367 | 453212 | 4995108 |
| 368 | 454536 | 4993748 |
| 369 | 454483 | 4992498 |
| 370 | 422961 | 5008854 |
| 371 | 424296 | 5008278 |
| 372 | 423195 | 5007915 |
| 373 | 423302 | 5009186 |
| 374 | 423506 | 5008044 |
| 375 | 432122 | 5005755 |
| 376 | 432617 | 5005700 |
| 377 | 431172 | 5005687 |
| 378 | 432735 | 5005958 |
| 379 | 432702 | 5006016 |
| 380 | 432059 | 5005596 |
| 381 | 431795 | 5005886 |
| 382 | 432054 | 5005402 |
| 383 | 431441 | 5005854 |
| 384 | 432175 | 5006686 |
| 385 | 431823 | 5005491 |
| 386 | 433253 | 5011264 |
| 387 | 434085 | 5010864 |
| 388 | 434637 | 5016576 |
| 389 | 433962 | 5016113 |
| 390 | 419343 | 5014460 |
| 391 | 421115 | 5014477 |
| 392 | 429987 | 5016480 |
| 393 | 425244 | 5014793 |
| 394 | 426182 | 5011011 |
| 395 | 429510 | 5011518 |
| 396 | 424419 | 5013265 |
| 397 | 428792 | 4995276 |
| 398 | 418776 | 4992145 |
| 399 | 429503 | 4990889 |
| 400 | 432528 | 4993733 |
| 401 | 434707 | 4999777 |
| 402 | 433595 | 5000314 |
| 403 | 448278 | 5000103 |
| 404 | 445373 | 5016699 |
| 405 | 431454 | 5014914 |
| 406 | 427854 | 5016518 |
| 407 | 423466 | 5013492 |
| 408 | 450048 | 5001790 |
| 409 | 445797 | 4999399 |
| 410 | 453233 | 4997130 |
| 411 | 454231 | 5006555 |
| 412 | 451905 | 5012599 |
| 413 | 441413 | 5011086 |
| 414 | 435150 | 5013144 |
| 415 | 434771 | 5012312 |
| 416 | 425906 | 4994323 |
| 417 | 438028 | 4999271 |
| 418 | 437846 | 4998537 |
| 419 | 442718 | 4995893 |
| 420 | 405766 | 5008253 |
| 421 | 406590 | 5008975 |
| 422 | 407690 | 5009271 |
| 423 | 408099 | 5008888 |
| 424 | 409174 | 5009609 |
| 425 | 409816 | 5009604 |
| 426 | 410542 | 5010576 |
| 427 | 410343 | 5012024 |
| 428 | 411013 | 5012919 |
| 429 | 406342 | 5015230 |
| 430 | 407805 | 5014779 |
| 431 | 410203 | 5013629 |
| 432 | 413679 | 5011909 |
| 433 | 412083 | 5012226 |
| 434 | 413234 | 5011602 |
| 435 | 416120 | 5012093 |
| 436 | 414665 | 5009685 |
| 437 | 416363 | 5007001 |
| 438 | 416197 | 5006576 |
| 439 | 415356 | 5007372 |
| 440 | 416651 | 5009326 |
| 441 | 417260 | 5007415 |
| 442 | 422452 | 5004008 |
| 443 | 424973 | 5003839 |
| 444 | 422752 | 5006592 |
| 445 | 424203 | 5006755 |
| 446 | 426663 | 5004707 |
| 447 | 428113 | 5004920 |
| 448 | 432627 | 5004063 |
| 449 | 438639 | 5003066 |
| 450 | 442308 | 5000097 |
| 451 | 442075 | 4999151 |
| 452 | 439270 | 5001766 |
| 453 | 436000 | 5003412 |
| 454 | 429513 | 5002178 |
| 455 | 422932 | 5002726 |
| 456 | 417405 | 5006270 |
| 457 | 415279 | 5009645 |
| 458 | 443367 | 4997616 |
| 459 | 442632 | 4997708 |
| 460 | 443306 | 4999532 |
| 461 | 443210 | 5001017 |
| 462 | 444543 | 5002961 |
| 463 | 445672 | 5003520 |
| 464 | 446104 | 5005999 |
| 465 | 447169 | 5006403 |
| 466 | 451352 | 5007291 |
| 467 | 452818 | 5008778 |
| 468 | 453013 | 5010439 |
| 469 | 455297 | 5013656 |
| 470 | 454798 | 5014568 |
| 471 | 454788 | 5014793 |
| 472 | 455262 | 5014961 |
| 473 | 453987 | 5014354 |
| 474 | 452620 | 5012007 |
| 475 | 452973 | 5012708 |
| 476 | 453695 | 5013130 |
| 477 | 452224 | 5016025 |
| 478 | 454334 | 5016342 |
| 479 | 453954 | 5015308 |
| 480 | 453152 | 5016384 |
| 481 | 452286 | 5015531 |
| 482 | 451864 | 5015796 |
| 483 | 450999 | 5015110 |
| 484 | 450282 | 5013929 |
| 485 | 450219 | 5014878 |
| 486 | 447418 | 5011630 |
| 487 | 448531 | 5011883 |
| 488 | 449194 | 5012267 |
| 489 | 449248 | 5012996 |
| 490 | 449691 | 5013697 |
| 491 | 449910 | 5013511 |
| 492 | 449952 | 5013895 |
| 493 | 445240 | 5012773 |
| 494 | 445081 | 5012193 |
| 495 | 447128 | 5010494 |
| 496 | 447317 | 5011148 |
| 497 | 446379 | 5011539 |
| 498 | 446126 | 5007541 |
| 499 | 445271 | 5009556 |
| 500 | 444385 | 5011201 |
| 501 | 442972 | 5013289 |
| 502 | 442501 | 5013304 |
| 503 | 441564 | 5014260 |
| 504 | 440501 | 5014893 |
| 505 | 440111 | 5015462 |
| 506 | 444098 | 4996171 |
| 507 | 443064 | 4997099 |
| 508 | 445371 | 4993985 |
| 509 | 446513 | 4992445 |
| 510 | 449551 | 4988437 |
| 511 | 452233 | 4996176 |
| 512 | 452335 | 4997191 |
| 513 | 453559 | 4998046 |
| 514 | 454097 | 4989692 |
| 515 | 451471 | 4989766 |
| 516 | 423622 | 4991342 |
| 517 | 423442 | 4988305 |
| 518 | 423336 | 4988606 |
| 519 | 423036 | 4988869 |
| 520 | 422930 | 4990288 |
| 521 | 423062 | 4989929 |
| 522 | 423004 | 4989645 |
| 523 | 423094 | 4989196 |
| 524 | 420436 | 4992878 |
| 525 | 420520 | 4992561 |
| 526 | 420441 | 4992435 |
| 527 | 420694 | 4992187 |
| 528 | 420615 | 4992007 |
| 529 | 420842 | 4991912 |
| 530 | 420731 | 4991675 |
| 531 | 421021 | 4991659 |
| 532 | 420916 | 4991422 |
| 533 | 421016 | 4991237 |
| 534 | 421142 | 4991422 |
| 535 | 417720 | 4990098 |
| 536 | 417646 | 4989908 |
| 537 | 417498 | 4989634 |
| 538 | 416955 | 4989966 |
| 539 | 417008 | 4989655 |
| 540 | 417071 | 4989444 |
| 541 | 417076 | 4989191 |
| 542 | 416829 | 4989070 |
| 543 | 416939 | 4988869 |
| 544 | 416728 | 4988743 |
| 545 | 417256 | 4989402 |
| 546 | 416723 | 4988500 |
| 547 | 416881 | 4988664 |
| 548 | 414295 | 4992930 |
| 549 | 414453 | 4992965 |
| 550 | 414534 | 4992804 |
| 551 | 414529 | 4992564 |
| 552 | 414608 | 4992456 |
| 553 | 414748 | 4992406 |
| 554 | 414271 | 4992743 |
| 555 | 414374 | 4992820 |
| 556 | 414324 | 4992564 |
| 557 | 414495 | 4992319 |
| 558 | 414656 | 4992076 |
| 559 | 414788 | 4992200 |
| 560 | 414745 | 4992052 |
| 561 | 407418 | 4989423 |
| 562 | 407344 | 4989154 |
| 563 | 407170 | 4989091 |
| 564 | 407159 | 4988885 |
| 565 | 407022 | 4988648 |
| 566 | 406869 | 4988569 |
| 567 | 406980 | 4987873 |
| 568 | 407048 | 4988221 |
| 569 | 406895 | 4988310 |
| 570 | 405593 | 4991812 |
| 571 | 405588 | 4991232 |
| 572 | 405667 | 4991612 |
| 573 | 406217 | 5013398 |
| 574 | 408919 | 5012415 |
| 575 | 406913 | 5010491 |
| 576 | 405930 | 5006439 |
| 577 | 411129 | 5008445 |
| 578 | 414240 | 5009959 |
| 579 | 416604 | 5008793 |
| 580 | 414230 | 5005845 |
| 581 | 409973 | 5004924 |
| 582 | 406984 | 5000258 |
| 583 | 416645 | 4999439 |
| 584 | 422048 | 5000586 |
| 585 | 416808 | 5002550 |
| 586 | 406984 | 4995837 |
| 587 | 412551 | 4988469 |
| 588 | 409604 | 4992399 |
| 589 | 413534 | 4996820 |
| 590 | 417955 | 4993709 |
| 591 | 423685 | 4995019 |
| 592 | 427942 | 4998948 |
| 593 | 427124 | 4989288 |
| 594 | 433345 | 4989615 |
| 595 | 429579 | 4993054 |
| 596 | 433509 | 5000586 |
| 597 | 432690 | 4995674 |
| 598 | 437275 | 4988797 |
| 599 | 443497 | 4989615 |
| 600 | 437602 | 4992071 |
| 601 | 435965 | 4998457 |
| 602 | 439403 | 4996820 |
| 603 | 411569 | 5015813 |
| 604 | 420738 | 5015321 |
| 605 | 428270 | 5015649 |
| 606 | 436784 | 5015813 |
| 607 | 427615 | 5004024 |
| 608 | 429784 | 5003615 |
| 609 | 431094 | 5005211 |
| 610 | 422212 | 5014421 |
| 611 | 416849 | 5014544 |
| 612 | 421106 | 5009755 |
| 613 | 426673 | 5006603 |
| 614 | 434369 | 5005620 |
| 615 | 441614 | 5004106 |
| 616 | 444111 | 5008608 |
| 617 | 439608 | 5009632 |
| 618 | 436743 | 5012661 |
| 619 | 429743 | 5009468 |
| 620 | 418364 | 5011474 |
| 621 | 428843 | 5012170 |
| 622 | 424013 | 5008240 |
| 623 | 431094 | 5007913 |
| 624 | 434532 | 5014175 |
| 625 | 441368 | 5011678 |
| 626 | 438094 | 5006889 |
| 627 | 426755 | 5010123 |
| 628 | 434287 | 5009959 |
| 629 | 411528 | 5001281 |
| 630 | 410102 | 5001594 |
| 631 | 445421 | 4987208 |
| 632 | 444506 | 4987445 |
| 633 | 431161 | 4987548 |
| 634 | 428313 | 4988006 |
| 635 | 430574 | 4989910 |
| 636 | 408115 | 4993856 |
| 637 | 409442 | 4994507 |
